## Non-ST elevation myocardial infarction in patients with previous CABG: what is the best treatment option?

L. Oliveira<sup>1</sup>, C. Machado<sup>1</sup>, C. Almeida<sup>1</sup>, M. Fatima Loureiro<sup>2</sup>, D. Martins<sup>1</sup>

<sup>1</sup>Hospital Divino Espirito Santo, Cardiology, Ponta Delgada, Portugal; <sup>2</sup>Portuguese Society of Cardiology, Lisbon, Portugal

On behalf of the Portuguese Registry of Acute Coronary Syndromes

**Funding Acknowledgement:** Type of funding sources: None.

**Background:** Current European Society of Cardiology guidelines recommend an invasive strategy (IS) for the treatment of non-ST elevation myocardial infarction (NSTEMI) patients, but the clinical trials that support this recommendations included only a few patients with previous coronary artery bypass graft (CABG).

**Purpose:** To characterize NSTEMI patients with previous CABG who underwent medical and invasive management and to evaluate the prognostic impact of the type of strategy used.

**Methods:** Retrospective analysis of a cohort of patients from a multicenter national registry diagnosed with NSTEMI with a previous history of CABG between 2010 and 2021. Patient's baseline demographics, medical history and in-hospital management data was collected. Outcomes of in-hospital and six months follow-up all-cause mortality were accessed.

**Results:** A total of 890 patients were included in the analysis. Of these, 470 were medically managed (MM) – this group included 249 patients (53.1%) who underwent coronary angiography but did not perform any further revascularization. The remaining 420 underwent an invasive strategy (IS) and performed additional revascularization, mainly percutaneous (only 1 patient submitted to reCABG). Mean age was similar (MM 72±10 vs IS

71±10 years,  $p=0.147$ ) and most patients were male (MM 81.5% vs IS 83.8%,  $p=0.362$ ). MM patients had more chronic kidney disease (16.7% vs 9.9%,  $p=0.003$ ), peripheral artery disease (20.5% vs 15.0%,  $p=0.003$ ) and heart failure (20.5% vs 11.9%,  $p<0.001$ ). Main presenting symptom was chest pain in both groups, however it was more frequent in the IS group (89.4% vs 94.5%,  $p=0.006$ ) and dyspnea in the MM patients (6.3% vs 3.1%). Mean left ventricle ejection fraction was similar between groups (MM 49±12% vs IS 50±11%,  $p=0.290$ ). Although the GRACE risk score was available for only 124 patients, high risk patients (GRACE score > 140) were equally distributed among the two groups (55.9% vs 48.2%,  $p=0.395$ ). An IS was associated with significant lower in-hospital mortality (4.5% vs 1.7%, OR 0.37, 95% CI 0.15–0.87,  $p=0.018$ ). At six months follow-up an IS was also associated with lower mortality (6.6% vs 2.4%, HR 0.18, 95% CI 0.06–0.52,  $p=0.002$ ), even after adjusting for the baseline differences (HR 0.41, 95% CI 0.20–0.85,  $p=0.016$ ).

**Conclusions:** In this cohort of patients with NSTEMI and previous CABG, an IS was linked to better outcomes during hospitalization and during six months follow-up. Randomized clinical trials are needed to address this issue.
